# Supplementary material
Source: HighWire-hosted journal article supplement (https://www.cmajopen.ca/highwire/filestream/89428/field_highwire_adjunct_files/3/open-2022-0103-original-submission.pdf)

1  
2  
3  
4 **Derivation and Validation of Pragmatic Clinical Models to Predict**

5  
6  
7 **Hospital Length of Stay After Cardiac Surgery in Ontario, Canada**

8  
9  
10  
11 **Short Title:** Predicting Length of Stay after Cardiac Surgery

12  
13  
14  
15 Alexandra Fottinger, BM BCh; Anan Bader Eddeen, MSc; Douglas S. Lee, MD, PhD; Graham  
16 Woodward, MSc; Louise Y. Sun, MD, SM

17  
18  
19  
20  
21 From the Division of Cardiac Anesthesiology, University of Ottawa Heart Institute, Ontario,  
22 Canada (AF, LYS); ICES, Ontario, Canada (ABE, DSL, LYS); Peter Munk Cardiac Centre,  
23 University Health Network, University of Toronto, Ontario, Canada (DSL); CorHealth Ontario  
24 (GW) and the School of Epidemiology and Public Health, University of Ottawa, Ontario, Canada  
25 (LYS).

26  
27  
28  
29  
30  
31  
32  
33 **Address for Correspondence:**

34  
35 Louise Y. Sun, MD, SM, FRCPC, FAHA

36  
37 Clinician Scientist and Associate Professor

38  
39 University of Ottawa Heart Institute

40  
41 Room H2410, 40 Ruskin Street, Ottawa, ON, Canada K1Y 4W7

42  
43  
44  
45 Phone: 1 613 696 7381 Email: [lsun@ottawaheart.ca](mailto:lsun@ottawaheart.ca)

46  
47  
48  
49 **Word Count:** 2035

1  
2  
3  
4  
5  
6  
7  
8 **Acknowledgments:** The authors acknowledge the usage of data compiled and provided by the  
9  
10 Canadian Institute for Health Information. These datasets were linked using unique encoded  
11  
12 identifiers and analyzed at ICES. The analyses, conclusions, opinions, and statements expressed  
13  
14 in the manuscript are those of the authors and do not necessarily reflect those of the above  
15  
16 agencies.  
17  
18  
19  
20

21 **Sources of Funding:** This study is supported by the COVID-19 Response Fund from the  
22  
23 University of Ottawa. LYS is named National New Investigator by the Heart and Stroke  
24  
25 Foundation of Canada and is the Clinical Research Chair in Big Data and Cardiovascular  
26  
27 Outcomes at the University of Ottawa. DSL is the Ted Rogers Chair in Heart Function  
28  
29 Outcomes, University Health Network, University of Toronto.  
30  
31  
32  
33  
34

35 This study was supported by ICES, which is funded by an annual grant from the Ontario Ministry  
36  
37 of Health (MOH) and the Ministry of Long-Term Care (MLTC). Parts of this material are based  
38  
39 on data and information compiled and provided by the Canadian Institute for Health Information  
40  
41 (CIHI). The authors acknowledge that the clinical registry data used in this analysis is from  
42  
43 participating hospitals through CorHealth Ontario, which serves as an advisory body to the MOH,  
44  
45 is funded by the MOH, and is dedicated to improving the quality, efficiency, access and equity in  
46  
47 the delivery of the continuum of adult cardiac and stroke care in Ontario, Canada. The analyses,  
48  
49 conclusions, opinions and statements expressed herein are solely those of the authors and do not  
50  
51 reflect those of the funding or data sources; no endorsement is intended or should be inferred.  
52  
53  
54  
55  
56  
57  
58  
59  
60

1  
2  
3  
4  
5  
6  
7  
8 **Disclosures:** none  
9

10  
11 **Data Sharing Statement:** The dataset from this study is held securely in coded form at ICES.  
12  
13 While legal data sharing agreements between ICES and data providers (e.g., healthcare  
14 organizations and government) prohibit ICES from making the dataset publicly available, access  
15 may be granted to those who meet pre-specified criteria for confidential access, available at  
16 [www.ices.on.ca/DAS](http://www.ices.on.ca/DAS) (email: [das@ices.on.ca](mailto:das@ices.on.ca)). The full dataset creation plan and underlying  
17 analytic code are available from the authors upon request, understanding that the computer  
18 programs may rely upon coding templates or macros that are unique to ICES and are therefore  
19 either inaccessible or may require modification.  
20  
21  
22  
23  
24  
25  
26  
27  
28  
29  
30  
31  
32

33 **Contributor Statement:**  
34

35 Conception and Design: LYS  
36

37 Data acquisition and analysis: ABE, LYS  
38

39 Interpretation of data: AF, ABE, LYS  
40

41 Drafting of the manuscript: AF, LYS  
42

43 Critical revision and final approval: AF, ABE, DSL, GW, LYS  
44

45 Agreement to be accountable for all aspects of the work in ensuring that questions related to the  
46 accuracy or integrity of any part of the work are appropriately investigated and resolved: LYS  
47  
48  
49  
50  
51  
52  
53  
54  
55  
56  
57  
58  
59  
60

## ABSTRACT

**Background:** Cardiac surgery is resource intensive and often requires considerable length of stay (LOS). To facilitate evidence-based resource planning, we derived and validated a set of clinical models to predict postoperative hospital LOS.

**Methods:** We used linked, population-level databases with information on all Ontario residents. Included were patients  $\geq 18$  years of age who underwent coronary artery bypass grafting, valvular, or thoracic aorta surgeries between October 2008 and September 2019. The primary outcome was hospital LOS. The models were derived on patients who had surgery before September 30, 2016 and validated on those after that date. To address the rightward skew in LOS data and to identify top-tier resource users, we used logistic regression to derive a model to predict the likelihood of LOS being  $>98^{\text{th}}$  percentile ( $\geq 35$  days). We then used gamma regression in the remainder to predict the actual LOS in days. We used backward stepwise variable selection for both models.

**Results:** Among 105,193 patients, 2,422 (2.3%) had LOS of  $\geq 35$  days. The median LOS was 46 (IQR, 37-66) days for those with LOS in the top 2 percentiles and 6 (5-8) days for those without. The c-statistic was 0.92 for the prolonged LOS model and the mean absolute error was 2.4 days for the model that predicted actual LOS.

**Interpretation:** We derived and validated a set of clinical models to identify top-tier resource users and predict actual LOS with excellent accuracy. Our models could be used to benchmark quality, rationally allocate resources and support patient-centered operative decision-making.

**Key Words:** cardiac surgery, length of stay, hospitalization, access to care, capacity planning, patient-centered research

## INTRODUCTION

1  
2  
3  
4  
5  
6  
7 Around the world, approximately 2 million cardiac surgeries are performed each year.<sup>1,2</sup> Cardiac  
8  
9  
10 surgery is resource intensive. It carries a higher burden of complications, requires intensive  
11  
12  
13 postoperative monitoring, and often longer hospital length of stay (LOS) as compared to  
14  
15  
16 noncardiac surgery<sup>3</sup>. With steady improvements in surgical technique and perioperative care,  
17  
18  
19 cardiac surgery is increasingly being offered to frail and complex patients with higher resource  
20  
21  
22 needs<sup>4,5</sup>. Organizations' drive for operational efficiency and competing capacity needs in the era  
23  
24  
25 of COVID-19 makes evidence-based triaging and resource allocation, founded on real-world  
26  
27  
28 data, an urgent priority. Prediction of intensive care unit (ICU) LOS after cardiac surgery<sup>6-8</sup> is  
29  
30  
31 important but does not fully reflect the extent of resources needed. Nonetheless, few models are  
32  
33  
34 available to predict postoperative LOS in hospital. Although existing models include those from  
35  
36  
37 the Society of Thoracic Surgeons (STS) and the EuroSCORE datasets<sup>9-11</sup>, they were developed  
38  
39  
40 to predict perioperative mortality and end organ morbidity and were only later validated in single  
41  
42  
43 center datasets for the purpose of predicting prolonged LOS. To better inform health resource  
44  
45  
46 planning, we derived and externally validated clinical models using population-based data to  
47  
48  
49 identify top-tier resource users and to predict actual hospital LOS after cardiac surgery.  
50  
51  
52  
53  
54  
55  
56  
57  
58  
59  
60

## METHODS

The dataset from this study is held securely in coded form at ICES (formerly the Institute for Clinical Evaluative Sciences). The use of data was authorized under section 45 of Ontario's *Personal Health Information Protection Act*, which does not require review by a research ethics board.<sup>12</sup>

### Design and Population

We conducted a population-based, retrospective cohort study of adult patients  $\geq 18$  years of age, who underwent coronary artery bypass grafting (CABG), aortic, mitral or tricuspid valve, or thoracic aorta surgery in Ontario, Canada between October 1, 2008 and September 30, 2019. For patients with multiple cardiac procedures during the study period, only the index procedure was included in the analyses. Ontario is the most populous province in Canada, with about 14.6 million residents and is ethnically diverse<sup>1,3</sup>.

### Data Source

We used the clinical registry of CorHealth Ontario and population-level administrative healthcare databases from ICES. ICES is an independent, non-profit research institute whose legal status under Ontario's health information privacy law allows it to collect and analyze health care and demographic data, without consent, for health system evaluation and improvement.

Datasets were linked deterministically using confidential identifiers and analyzed at ICES. ICES holds multiple population-based health databases of Ontario residents. CorHealth Ontario

1  
2  
3 maintains a prospective registry of all patients who undergo invasive cardiac procedures in  
4 Ontario and regularly undergoes selected chart audits and core laboratory validation.<sup>12</sup>  
5  
6  
7  
8  
9

10 We linked the CorHealth Ontario registry (patient and procedural details) with the Canadian  
11 Institute for Health Information Discharge Abstract Database (comorbidities, hospital admissions  
12 and in-hospital procedures), the Ontario Health Insurance Plan database (physician service  
13 claims) and the Registered Persons Database (vital statistics). These administrative databases  
14 have been validated for many outcomes, exposures, and comorbidities, including heart failure,  
15 chronic obstructive pulmonary disease, asthma, hypertension, and diabetes.<sup>14-17</sup>  
16  
17  
18  
19  
20  
21  
22  
23  
24  
25

26 Potential covariates considered in the analyses are described in **Table 1** and included  
27 demographic, physiological, anatomical and comorbidity data, as well as procedure-specific  
28 information (operative priority status, redo sternotomy, type of surgery, and surgery duration).  
29 We obtained data on height, weight, operative priority, and information pertaining to LVEF,  
30 valvular disease and coronary anatomy from the CorHealth Ontario registry. In addition, we  
31 identified comorbidities from the CorHealth Ontario registry which we supplemented with data  
32 from the Discharge Abstract Database and the Ontario Health Insurance Plan database using  
33 International Classification of Diseases 10<sup>th</sup> Revision (ICD-10-CA) codes<sup>18</sup> within five years  
34 prior to surgery, according to validated algorithms.<sup>14,16,19,20</sup>  
35  
36  
37  
38  
39  
40  
41  
42  
43  
44  
45  
46  
47  
48

## 49 **Outcome**

50  
51 The primary outcome was hospital LOS. As LOS data is invariably right-skewed with extreme  
52 values in those with prolonged stay,<sup>21,22</sup> we derived two separate models: the first (binary  
53 outcome model) to identify the top-tier resource users (i.e., LOS exceeding the 98<sup>th</sup> percentile  
54  
55  
56  
57

1  
2  
3 value of  $\geq 35$  days), and the other (continuous outcome model) to predict the actual LOS in days  
4  
5 in the remainder of the cohort.  
6  
7  
8  
9

## 10 **Statistical Analysis**

11  
12 We compared continuous variables using a 2-sample *t*-test or Wilcoxon rank sum test where  
13  
14 appropriate, and categorical variables using a chi-square test.  
15  
16

## 17 ***Missing Data***

18  
19  
20 Left ventricular ejection fraction (LVEF) was missing in 3 582 (3.4%), rurality status in 87  
21  
22 (0.08%), income quintile in 272 (0.26%), GFR in 4 671 (4.4%), BMI in 5 583 (5.3%), surgery  
23  
24 duration in 1 317 (1.2%) and operative priority 12 060 (11.5%) patients. We imputed these  
25  
26 missing values once within the SAS “proc MI” framework, where they were predicted drawing  
27  
28 on all candidate covariates using predictive mean matching for continuous variables and logistic  
29  
30 regression for categorical variables.<sup>23</sup>  
31  
32  
33

## 34 ***Model Development and Validation***

35  
36 We split the cohort temporally into a derivation and validation datasets, such that the cohort who  
37  
38 underwent cardiac surgery before September 30, 2016 was used to derive the models and the  
39  
40 remainder of the cohort was used to externally validate these models. We predicted prolonged  
41  
42 hospital LOS using logistic regression and actual hospital LOS using gamma regression. For  
43  
44 each of the models, we selected predictor variables using a backward stepwise algorithm with a  
45  
46 significance threshold of  $P < 0.1$  for entry and  $P < 0.05$  for retention in the model.<sup>24</sup> For  
47  
48 continuous variables, we examined their association with the outcome using cubic splines. Most  
49  
50 of these variables were entered into the models as continuous values, while body mass index  
51  
52 (BMI) violated the linearity assumption and was entered as a spline term.  
53  
54  
55  
56  
57  
58  
59  
60



### ***Model Evaluation***

The discrimination of the binary outcome model was evaluated using the c-statistic and its calibration was assessed using the Brier score,<sup>25</sup> as well as plots of observed versus predicted rates within deciles of predicted risk in the validation cohort. The performance of the continuous outcome model was assessed using the mean absolute error (MAE), as well as plots of mean observed versus predicted LOS in days within each decile of observed LOS in the validation cohort.

We performed the analysis using SAS 9.4 (SAS Institute, Cary, NC) and defined statistical significance by a two-sided *P*-value of  $< 0.05$ .

## **RESULTS**

### **Patient Characteristics**

Among 105 193 patients, 2 422 (2.3%) had prolonged hospital LOS of  $\geq 35$  days. The median LOS was 46 (IQR, 37-66) days for those with prolonged LOS and 6 (5-8) for the remainder of the cohort. Patient characteristics were notably different between groups (**Table 1**). Patients with prolonged hospital LOS were older, more frail, and more likely to be female, have lower income levels and to present urgently and emergently for complex procedures (CABG + valve(s),

1  
2  
3 multiple valves and thoracic aorta surgery) at teaching hospitals. They are also more likely to  
4  
5  
6  
7 have a higher multimorbidity burden, reduced LVEF, and longer surgical durations.  
8  
9  
10  
11  
12

### 13 **Predictors of Length of Stay**

14  
15  
16  
17 The binary model for prolonged LOS consisted of 16 variables (**Table 2**) and the continuous  
18  
19  
20 model consisted of 28 variables (**Table 3**). The characteristics common to both models are  
21  
22  
23 procedure type and duration, age, rural residence, BMI, frailty, Canadian Cardiovascular Society  
24  
25  
26 and New York Heart Association classification status, LVEF, glomerular filtration rate, valvular  
27  
28  
29 disease, diabetes requiring treatment, anemia, cerebrovascular disease, malignancy, and  
30  
31  
32 depression. The continuous outcome model additionally included sex, presenting at a community  
33  
34  
35 hospital, operative priority, atrial fibrillation, endocarditis, peripheral arterial disease, COPD,  
36  
37  
38 pulmonary circulatory disease, alcoholism, dementia, and psychosis.  
39  
40  
41  
42  
43  
44  
45  
46

### 47 **Model Performance**

#### 48 49 50 *Binary outcome model*

1  
2  
3 The c-statistic was 0.92 in both derivation and validation datasets, demonstrating excellent  
4  
5  
6 discrimination. The model was well calibrated, with a Brier score of 0.016 and the observed and  
7  
8  
9 predicted risks of prolonged LOS being very similar across all probability deciles in the  
10  
11  
12 calibration dataset (**Figure 1**).

### 13 14 15 16 17 *Continuous outcome model*

18  
19  
20 The continuous model had a MAE of 2.3 days in the derivation dataset. The MAE was 2.4 in the  
21  
22  
23 validation dataset, indicating good predictive accuracy. The calibration plot in **Figure 2** shows  
24  
25  
26 that the mean observed and predicted hospital LOS within each LOS decile were nearly identical  
27  
28  
29 in the validation cohort.

## 30 31 32 33 34 35 36 37 38 **INTERPRETATION**

39  
40  
41 Operative decision-making may be enhanced by objective tools to more efficiently allocate  
42  
43  
44 resources in a patient-centered manner. Traditional statistical models are dated; they are limited  
45  
46  
47 to the prediction of prolonged LOS of varying durations and fail to predict actual LOS<sup>26–29</sup>.

48  
49  
50 While the latter is beginning to be explored using machine learning techniques in isolated CABG  
51  
52  
53 patients, it is based on small, single-center datasets and lack generalizability in the broader  
54  
55  
56

1  
2  
3 healthcare setting<sup>30,31</sup>. Our models were pragmatically designed for operational capacity planning  
4  
5  
6  
7 and were derived and validated in a large and representative population to overcome these  
8  
9  
10 limitations. In this population, the risk-adjusted average hospital LOS for the 2011 – 2016 fiscal  
11  
12  
13 years were reported as 7.85 days for isolated CABG, 9.26 days for isolated AVR, and 12.07 days  
14  
15  
16 for CABG/AVR<sup>32</sup>. Of note, this report had trimmed hospital LOS at the 99<sup>th</sup> percentile to remove  
17  
18  
19 extreme observations, much like the methodology employed in our analysis to isolate top-tier  
20  
21  
22 resource users who are at the highest risk of complications, worsening frailty, functional decline  
23  
24  
25 and loss of personal freedom and independence after surgery<sup>12,33-37</sup>. The ability to identify those  
26  
27  
28 at risk for extremely prolonged LOS allows for better decision-making from the perspectives of  
29  
30  
31 the healthcare system as well as the individual patient. As the system level, this ability, coupled  
32  
33  
34 with actual LOS prediction, will facilitate data-driven clinical scheduling to increase throughput,  
35  
36  
37 facilitate targeted interventions such as prehabilitation, Enhanced Recovery After Surgery, and  
38  
39  
40 early referral to continuing care facilities. As prolonged LOS has also been implicated with  
41  
42  
43 increased healthcare cost<sup>9</sup> and disability after discharge,<sup>12,35,36,38,39</sup> our predictive models will  
44  
45  
46  
47  
48  
49 inform effective provider-patient discussions and encourage patient-centered operative decision-  
50  
51  
52  
53  
54 making.

1  
2  
3  
4  
5  
6  
7 Notably, our binary outcome model demonstrated excellent performance with a c-statistic of 0.92  
8  
9  
10 and outperforms existing models. Comparatively, the EuroScore had a c-statistic of 0.71 (0.69-  
11  
12  
13 0.72) for predicting prolonged hospital LOS (> 12 days) when validated in a monocentric  
14  
15  
16 setting<sup>11</sup>, and the STS model had a c-statistic of 0.716-0.732 for predicting short hospital LOS of  
17  
18  
19  $\leq 5$  days and 0.739-0.796 for predicting prolonged stay of > 5 days, depending on the type of  
20  
21  
22 surgery performed.<sup>40</sup> It should also be noted that these models rely on designated staff for data  
23  
24  
25 collection, which constitutes further healthcare resource demands and is not feasible at all  
26  
27  
28  
29  
30  
31 centers.

32  
33  
34  
35  
36  
37 Our continuous outcome model was able to predict LOS with an error margin of 2 days, which is  
38  
39  
40 accepted in a publicly funded healthcare ecosystem given LOS could be influenced by the  
41  
42  
43 availability of post-discharge continuing care facilities and home-based caregivers rather than  
44  
45  
46 medical indications alone. Importantly, our ability to predict actual LOS enables precision-based  
47  
48  
49 hospital capacity planning, as well as quality benchmarking and incentivized allocation of  
50  
51  
52 healthcare funding. Incorporation of the model into tools such as the province-wide CorHealth  
53  
54  
55  
56  
57  
58  
59  
60

1  
2  
3  
4 information system could also help individual providers to understand bed requirements at the  
5  
6  
7 time of intervention, allowing for more accurate resource planning.  
8  
9

10  
11  
12  
13 Many risk factors from our LOS models are consistent with those published in the literature<sup>9,41</sup>.  
14  
15

16  
17 We were additionally able to incorporate frailty as a defining element of perioperative outcomes  
18  
19  
20 and recovery<sup>42,43</sup>, as well as anemia, dementia, psychosis, hospital type, and a variety of  
21  
22  
23 sociodemographic factors to ensure that all patient groups are equally represented. The variables  
24  
25  
26 included in our models are routinely collected and readily available to facilitate their adoption at  
27  
28  
29  
30 most institutions.  
31  
32  
33  
34  
35  
36

### 37 **Strengths and Limitations**

38  
39  
40 Notable strengths of our models include their generalizability across the scope of cardiac surgery  
41  
42  
43 in a large and representative population, as well as their relevance to clinicians, policy makers  
44  
45  
46 and patients. Limitations include the lack of certain detailed physiologic measures such as the  
47  
48  
49 brain natriuretic peptide in the databases used, as well as their limited application in those who  
50  
51  
52 undergo minimally invasive cardiac procedures.  
53  
54  
55  
56  
57

## CONCLUSIONS

We derived and validated a set of clinical prediction models to identify top-tier resource users (hospital LOS  $\geq 35$  days) and actual LOS after cardiac surgery with excellent accuracy. The importance of these models lies in their potential to support medical resource planning and patient-centered decision-making. Care, outcomes, and patient satisfaction may be substantially improved if clinical judgment is supported by objective quantification in the planning of care. Being based on an unbiased population-based sample, these models could be combined with established ICU LOS<sup>7</sup> and waitlist<sup>44</sup> management tools to provide evidence-based triaging decision support, to conserve system capacity, enhance operational efficiency, as well as to benchmark performance.

## REFERENCES

1. Sun LY, Gaudino M, Chen RJ, Bader Eddeen A, Ruel M. Long-term Outcomes in Patients With Severely Reduced Left Ventricular Ejection Fraction Undergoing Percutaneous Coronary Intervention vs Coronary Artery Bypass Grafting. *JAMA Cardiol.* 2020;5:631–641.
2. Hu J, Chen R, Liu S, Yu X, Zou J, Ding X. Global Incidence and Outcomes of Adult Patients With Acute Kidney Injury After Cardiac Surgery: A Systematic Review and Meta-Analysis. *J. Cardiothorac. Vasc. Anesth.* 2016;30:82–89.
3. Fry DE, Pine M, Jones BL, Meimban RJ. Adverse outcomes in surgery: redefinition of postoperative complications. *Am. J. Surg.* [Internet]. 2009;197:479–484. Available from: <https://www.sciencedirect.com/science/article/pii/S0002961008007678>
4. Montgomery C, Stelfox H, Norris C, Rolfson D, Meyer S, Zibdawi M, Bagshaw S. Association between preoperative frailty and outcomes among adults undergoing cardiac surgery: a prospective cohort study. *C. open.* 2021;9:E777–E787.
5. Buth KJ, Gainer RA, Legare J-F, Hirsch GM. The changing face of cardiac surgery: practice patterns and outcomes 2001-2010. *Can. J. Cardiol.* 2014;30:224–230.
6. Rotar EP, Beller JP, Smolkin ME, Chancellor WZ, Ailawadi G, Yarboro LT, Hulse M, Ratcliffe SJ, Teman NR. Prediction of Prolonged Intensive Care Unit Length of Stay Following Cardiac Surgery. *Semin. Thorac. Cardiovasc. Surg.* 2021;
7. Sun LY, Bader Eddeen A, Ruel M, MacPhee E, Mesana TG. Derivation and Validation of a Clinical Model to Predict Intensive Care Unit Length of Stay After Cardiac Surgery. *J. Am. Heart Assoc.* 2020;9:e017847.
8. Meadows K, Gibbens R, Gerrard C, Vuylsteke A. Prediction of Patient Length of Stay on the Intensive Care Unit Following Cardiac Surgery: A Logistic Regression Analysis Based on the Cardiac Operative Mortality Risk Calculator, EuroSCORE. *J. Cardiothorac. Vasc. Anesth.* 2018;32:2676–2682.
9. Osnabrugge RL, Speir AM, Head SJ, Jones PG, Ailawadi G, Fonner CE, Fonner EJ, Kappetein AP, Rich JB. Prediction of costs and length of stay in coronary artery bypass grafting. *Ann. Thorac. Surg.* 2014;98:1286–1293.
10. Peterson ED, Coombs LP, Ferguson TB, Shroyer AL, DeLong ER, Grover FL, Edwards FH. Hospital variability in length of stay after coronary artery bypass surgery: results



- 1  
2  
3  
4 from the Society of Thoracic Surgeon's National Cardiac Database. *Ann. Thorac. Surg.*  
5 2002;74:464–473.  
6
- 7 11. Toumpoulis IK, Anagnostopoulos CE, Swistel DG, DeRose Jr JJ. Does EuroSCORE  
8 predict length of stay and specific postoperative complications after cardiac surgery? *Eur.*  
9 *J. Cardio-Thoracic Surg.* [Internet]. 2005;27:128–133. Available from:  
10 <https://doi.org/10.1016/j.ejcts.2004.09.020>  
11
- 12 12. Sun LY, Spence SD, Benton S, Beanlands RS, Austin PC, Bader Eddeen A, Lee DS. Age,  
13 Not Sex, Modifies the Effect of Frailty on Long-term Outcomes After Cardiac Surgery.  
14 *Ann. Surg.* 2020;  
15
- 16 13. Sun LY, Boet S, Chan V, Lee DS, Mesana TG, Bader Eddeen A, Etherington C. Impact of  
17 surgeon and anaesthesiologist sex on patient outcomes after cardiac surgery: a  
18 population-based study. *BMJ Open.* 2021;11:e051192.  
19
- 20 14. Tu K, Campbell NR, Chen Z-L, Cauch-Dudek KJ, McAlister FA. Accuracy of  
21 administrative databases in identifying patients with hypertension. *Open Med.*  
22 2007;1:e18-26.  
23
- 24 15. Juurlink D, Preya C, Croxford R, Chong A, Austin P, Tu J, A L. Canadian Institute for  
25 Health Information Discharge Abstract Database: A Validation Study. 2006;  
26
- 27 16. Hux JE, Ivis F, Flintoft V, Bica A. Diabetes in Ontario: determination of prevalence and  
28 incidence using a validated administrative data algorithm. *Diabetes Care.* 2002;25:512–  
29 516.  
30
- 31 17. Austin PC, Daly PA, Tu J V. A multicenter study of the coding accuracy of hospital  
32 discharge administrative data for patients admitted to cardiac care units in Ontario. *Am.*  
33 *Heart J.* 2002;144:290–296.  
34
- 35 18. Quan H, Sundararajan V, Halfon P, Fong A, Burnand B, Luthi J-C, Saunders LD, Beck  
36 CA, Feasby TE, Ghali WA. Coding algorithms for defining comorbidities in ICD-9-CM  
37 and ICD-10 administrative data. *Med. Care.* 2005;43:1130–1139.  
38
- 39 19. Gershon AS, Wang C, Guan J, Vasilevska-Ristovska J, Cicutto L, To T. Identifying  
40 individuals with physician diagnosed COPD in health administrative databases. *COPD.*  
41 2009;6:388–394.  
42
- 43 20. Schultz SE, Rothwell DM, Chen Z, Tu K. Identifying cases of congestive heart failure  
44 from administrative data: a validation study using primary care patient records. *Chronic*  
45 *Dis. Inj. Can.* 2013;33:160–166.  
46  
47  
48  
49  
50  
51  
52  
53  
54  
55  
56  
57  
58  
59  
60

21. Austin PC, Rothwell DM, Tu J V. A Comparison of Statistical Modeling Strategies for Analyzing Length of Stay after CABG Surgery. *Heal. Serv. Outcomes Res. Methodol.* [Internet]. 2002;3:107–133. Available from: <https://doi.org/10.1023/A:1024260023851>
22. Almashrafi A, Elmontsri M, Aylin P. Systematic review of factors influencing length of stay in ICU after adult cardiac surgery. *BMC Health Serv. Res.* [Internet]. 2016;16:318. Available from: <https://doi.org/10.1186/s12913-016-1591-3>
23. Rubin DB, Schenker N. Multiple imputation in health-care databases: an overview and some applications. *Stat. Med.* 1991;10:585–598.
24. Kuk D, Varadhan R. Model selection in competing risks regression. *Stat. Med.* 2013;32:3077–3088.
25. Harrell FEJ, Lee KL, Mark DB. Multivariable prognostic models: issues in developing models, evaluating assumptions and adequacy, and measuring and reducing errors. *Stat. Med.* 1996;15:361–387.
26. Shahian DM, O’Brien SM, Filardo G, Ferraris VA, Haan CK, Rich JB, Normand S-LT, DeLong ER, Shewan CM, Dokholyan RS, et al. The Society of Thoracic Surgeons 2008 cardiac surgery risk models: part 1--coronary artery bypass grafting surgery. *Ann. Thorac. Surg.* 2009;88:S2-22.
27. Ivanov J, Borger MA, Rao V, David TE. The Toronto Risk Score for adverse events following cardiac surgery. *Can. J. Cardiol.* 2006;22:221–227.
28. Hannan EL, Farrell LS, Wechsler A, Jordan D, Lahey SJ, Culliford AT, Gold JP, Higgins RSD, Smith CR. The New York risk score for in-hospital and 30-day mortality for coronary artery bypass graft surgery. *Ann. Thorac. Surg.* 2013;95:46–52.
29. Tu J V, Jaglal SB, Naylor CD. Multicenter validation of a risk index for mortality, intensive care unit stay, and overall hospital length of stay after cardiac surgery. Steering Committee of the Provincial Adult Cardiac Care Network of Ontario. *Circulation.* 1995;91:677–684.
30. Triana AJ, Vyas R, Shah AS, Tiwari V. Predicting Length of Stay of Coronary Artery Bypass Grafting Patients Using Machine Learning. *J. Surg. Res.* 2021;264:68–75.
31. Alshakhs F, Alharthi H, Aslam N, Khan IU, Elasheri M. Predicting Postoperative Length of Stay for Isolated Coronary Artery Bypass Graft Patients Using Machine Learning. *Int. J. Gen. Med.* 2020;13:751–762.
32. Oakes G. Report on Adult Cardiac Surgery: Isolated Coronary Artery Bypass Graft

- (CABG) Surgery, Isolated Aortic Valve Replacement (AVR) Surgery and Combined CABG and AVR Surgery October 2011 - March 2016. Toronto: 2018.
33. Panah M, Andres LA, Strobe SA, Vela-Cantos F, Bennett-Guerrero E. Morbidity associated with prolonged hospital length of stay following cardiac surgery. *Anesth. Analg.* [Internet]. 1998;86. Available from: [https://journals.lww.com/anesthesia-analgia/Fulltext/1998/04001/MORBIDITY\\_ASSOCIATED\\_WITH\\_PROLONGED\\_HOSPITAL.50.aspx](https://journals.lww.com/anesthesia-analgia/Fulltext/1998/04001/MORBIDITY_ASSOCIATED_WITH_PROLONGED_HOSPITAL.50.aspx)
34. Nakano M, Nomura Y, Suffredini G, Bush B, Tian J, Yamaguchi A, Walston J, Hasan R, Mandal K, Schena S, et al. Functional Outcomes of Frail Patients After Cardiac Surgery: An Observational Study. *Anesth. Analg.* [Internet]. 2020;130. Available from: [https://journals.lww.com/anesthesia-analgia/Fulltext/2020/06000/Functional\\_Outcomes\\_of\\_Frail\\_Patients\\_After.12.aspx](https://journals.lww.com/anesthesia-analgia/Fulltext/2020/06000/Functional_Outcomes_of_Frail_Patients_After.12.aspx)
35. Tran DTT, Tu J V., Dupuis JY, Eddeen AB, Sun LY. Association of frailty and long-term survival in patients undergoing coronary artery bypass grafting. *J. Am. Heart Assoc.* 2018;
36. Sun LY, Eddeen AB, Mesana TG. Disability-free survival after major cardiac surgery: a population-based retrospective cohort study. *C. open.* 2021;9:E384–E393.
37. Sun LY, Tu J V, Lee DS, Beanlands RS, Ruel M, Austin PC, Eddeen AB, Liu PP. Disability-free survival after coronary artery bypass grafting in women and men with heart failure. *Open Hear.* 2018;5:e000911.
38. Diab MS, Bilkhu R, Soppa G, Edsell M, Fletcher N, Heiberg J, Royse C, Jahangiri M. The influence of prolonged intensive care stay on quality of life, recovery, and clinical outcomes following cardiac surgery: A prospective cohort study. *J. Thorac. Cardiovasc. Surg.* 2018;156:1906-1915.e3.
39. Sun LY, Rodger J, Duffett L, Tulloch H, Crean AM, Chong A-Y, Rubens FD, MacPhee E, Mesana TG, Lee DS, et al. Derivation of Patient-Defined Adverse Cardiovascular and Noncardiovascular Events Through a Modified Delphi Process. *JAMA Netw. open.* 2021;4:e2032095.
40. O'Brien SM, Feng L, He X, Xian Y, Jacobs JP, Badhwar V, Kurlansky PA, Furnary AP, Cleveland JCJ, Lobdell KW, et al. The Society of Thoracic Surgeons 2018 Adult Cardiac Surgery Risk Models: Part 2-Statistical Methods and Results. *Ann. Thorac. Surg.* 2018;105:1419–1428.
41. Lazar HL, Fitzgerald C, Gross S, Heeren T, Aldea GS, Shemin RJ. Determinants of length

- 1  
2  
3  
4 of stay after coronary artery bypass graft surgery. *Circulation*. 1995;92:II20-4.
- 5  
6 42. Sepehri A, Beggs T, Hassan A, Rigatto C, Shaw-Daigle C, Tangri N, Arora RC. The  
7 impact of frailty on outcomes after cardiac surgery: a systematic review. *J Thorac*  
8 *Cardiovasc Surg*. 2014;
- 9  
10 43. Lal S, Gray A, Kim E, Bunton RW, Davis P, Galvin IF, Williams MJA. Frailty in Elderly  
11 Patients Undergoing Cardiac Surgery Increases Hospital Stay and 12-Month Readmission  
12 Rate. *Heart. Lung Circ*. 2020;29:1187–1194.
- 13  
14  
15 44. Sun LY, Eddeen AB, Wijesundera HC, Mamas MA, Tam DY, Mesana TG. Derivation  
16 and validation of a clinical model to predict death or cardiac hospitalizations while on the  
17 cardiac surgery waitlist. *C. Can. Med. Assoc. J*. 2021;193:E1333–E1340.
- 18  
19  
20  
21  
22  
23  
24

## 25 FIGURE LEGENDS

26  
27  
28  
29  
30  
31 **Figure 1.** Calibration plot of observed vs. predicted risk of extremely prolonged postoperative  
32 hospital length of stay of  $\geq 35$  days, according to deciles of expected rate.

33  
34  
35  
36  
37  
38  
39

40 **Figure 2.** Calibration plot of observed vs. predicted average lengths of hospital stay in days,  
41 within each decile of expected length of stay.

42  
43  
44  
45  
46  
47  
48  
49  
50  
51  
52  
53  
54  
55  
56  
57  
58  
59  
60

## TABLES

Table 1. Baseline characteristics of patients by length of hospital stay.

|                                      | Length of stay <35 d | Length of stay ≥35 d | P-Value |
|--------------------------------------|----------------------|----------------------|---------|
| <b>Demographics</b>                  |                      |                      |         |
| Age, Mean +/- SD, y                  | 66.26 (10.76)        | 70.64 (11.34)        | <0.001  |
| Age, Median (IQR), y                 | 67 (59-74)           | 73 (64-79)           | <0.001  |
| Female sex, n (%)                    | 25 151 (24.5%)       | 832 (34.4%)          | <0.001  |
| BMI, Mean +/- SD, kg/m <sup>2</sup>  | 28.85 (5.74)         | 29.25 (6.81)         | 0.001   |
| BMI, Median (IQR), kg/m <sup>2</sup> | 28 (25-32)           | 28 (25-33)           | 0.504   |
| Rural residence, n (%)               | 15 853 (15.4%)       | 318 (13.1%)          | 0.002   |
| Hospital type, n (%)                 |                      |                      | <0.001  |
| Community                            | 29 328 (28.5%)       | 553 (22.8%)          |         |
| Teaching                             | 73 443 (71.5%)       | 1 869 (77.2%)        |         |
| Income Quintile                      |                      |                      | <0.001  |
| 1 (lowest)                           | 19 540 (19.0%)       | 564 (23.3%)          |         |
| 2                                    | 20 992 (20.4%)       | 546 (22.5%)          |         |
| 3                                    | 21 122 (20.6%)       | 487 (20.1%)          |         |
| 4                                    | 20 754 (20.2%)       | 446 (18.4%)          |         |
| 5 (highest)                          | 20 363 (19.8%)       | 379 (15.6%)          |         |
| <b>Comorbidities</b>                 |                      |                      |         |
| Hypertension, n (%)                  | 87 359 (85.0%)       | 2 188 (90.3%)        | <0.001  |
| Atrial fibrillation, n (%)           | 6 905 (6.7%)         | 397 (16.4%)          | <0.001  |
| Recent MI, n (%)                     | 23 547 (22.9%)       | 637 (26.3%)          | <0.001  |
| CCS classification, n (%)            |                      |                      | <0.001  |
| 0                                    | 21 997 (21.4%)       | 703 (29.0%)          |         |
| 1                                    | 9 733 (9.5%)         | 183 (7.6%)           |         |
| 2                                    | 17 026 (16.6%)       | 164 (6.8%)           |         |
| 3                                    | 15 106 (14.7%)       | 246 (10.2%)          |         |
| 4                                    | 3 584 (3.5%)         | 99 (4.1%)            |         |
| Low-risk ACS                         | 15 530 (15.1%)       | 265 (10.9%)          |         |
| Intermediate-risk ACS                | 13 343 (13.0%)       | 331 (13.7%)          |         |
| High-risk ACS                        | 3 883 (3.8%)         | 155 (6.4%)           |         |
| Emergent                             | 2 569 (2.5%)         | 276 (11.4%)          |         |

|    |                                              |                 |               |        |
|----|----------------------------------------------|-----------------|---------------|--------|
| 1  |                                              |                 |               |        |
| 2  |                                              |                 |               |        |
| 3  |                                              |                 |               |        |
| 4  | Left ventricular ejection fraction, n        |                 |               |        |
| 5  | (%)                                          |                 |               | <0.001 |
| 6  | ≥ 50%                                        | 72 714 (70.8%)  | 1 464 (60.4%) |        |
| 7  | 35-49%                                       | 20 860 (20.3%)  | 552 (22.8%)   |        |
| 8  | 20-35%                                       | 7 847 (7.6%)    | 321 (13.3%)   |        |
| 9  | <20%                                         | 1 350 (1.3%)    | 85 (3.5%)     |        |
| 10 |                                              |                 |               |        |
| 11 |                                              |                 |               |        |
| 12 | NYHA classification, n (%)                   |                 |               | <0.001 |
| 13 | 1                                            | 72 445 (70.5%)  | 1 273 (52.6%) |        |
| 14 | 2                                            | 15 396 (15.0%)  | 350 (14.5%)   |        |
| 15 | 3                                            | 12 153 (11.8%)  | 532 (22.0%)   |        |
| 16 | 4                                            | 2 777 (2.7%)    | 267 (11.0%)   |        |
| 17 |                                              |                 |               |        |
| 18 |                                              |                 |               |        |
| 19 | Heart failure, n (%)                         | 26 585 (25.9%)  | 1 455 (60.1%) | <0.001 |
| 20 | Valve disease, n (%)                         | 29 813 (29.0%)  | 1 184 (48.9%) | <0.001 |
| 21 |                                              |                 |               |        |
| 22 | Endocarditis, n (%)                          |                 |               | <0.001 |
| 23 | None                                         | 101 436 (98.7%) | 2 293 (94.7%) |        |
| 24 | Acute                                        | 938 (0.9%)      | 112 (4.6%)    |        |
| 25 | Subacute                                     | 397 (0.4%)      | 17 (0.7%)     |        |
| 26 |                                              |                 |               |        |
| 27 | Cerebrovascular disease, n (%)               | 9 948 (9.7%)    | 385 (15.9%)   | <0.001 |
| 28 | Peripheral arterial disease, n (%)           | 13 647 (13.3%)  | 502 (20.7%)   | <0.001 |
| 29 |                                              |                 |               |        |
| 30 | Smoking status, n (%)                        |                 |               | <0.001 |
| 31 | None                                         | 47 527 (46.2%)  | 1 185 (48.9%) |        |
| 32 | Current                                      | 19 889 (19.4%)  | 459 (19.0%)   |        |
| 33 | Former                                       | 35 355 (34.4%)  | 778 (32.1%)   |        |
| 34 |                                              |                 |               |        |
| 35 | COPD, n (%)                                  | 23 756 (23.1%)  | 833 (34.4%)   | <0.001 |
| 36 | Diabetes, n (%)                              | 29 816 (29.0%)  | 833 (34.4%)   | <0.001 |
| 37 |                                              |                 |               |        |
| 38 | GFR, Mean +/- SD, ml/min/1.73m <sup>2</sup>  | 74.05 (21.42)   | 58.78 (25.42) | <0.001 |
| 39 |                                              |                 |               |        |
| 40 | GFR, Median (IQR), ml/min/1.73m <sup>2</sup> | 77 (61-90)      | 58 (41-79)    | <0.001 |
| 41 | Dialysis, n (%)                              | 2 070 (2.0%)    | 196 (8.1%)    | <0.001 |
| 42 | Anemia, n (%)                                | 10 170 (9.9%)   | 714 (29.5%)   | <0.001 |
| 43 |                                              |                 |               |        |
| 44 | Liver disease, n (%)                         | 977 (1.0%)      | 58 (2.4%)     | <0.001 |
| 45 | Dementia, n (%)                              | 1 296 (1.3%)    | 86 (3.6%)     | <0.001 |
| 46 |                                              |                 |               |        |
| 47 | Depression, n (%)                            | 1 359 (1.3%)    | 132 (5.5%)    | <0.001 |
| 48 | Psychosis, n (%)                             | 205 (0.2%)      | 9 (0.4%)      | 0.0631 |
| 49 |                                              |                 |               |        |
| 50 | Malignancy, n (%)                            | 5 207 (5.1%)    | 174 (7.2%)    | <0.001 |
| 51 | Paraplegia, n (%)                            | 294 (0.3%)      | 22 (0.9%)     | <0.001 |
| 52 |                                              |                 |               |        |
| 53 | Pulmonary circulatory disease, n (%)         | 2 279 (2.2%)    | 181 (7.5%)    | <0.001 |
| 54 |                                              |                 |               |        |
| 55 | Hospital frailty risk score *                |                 |               | <0.001 |
| 56 |                                              |                 |               |        |
| 57 |                                              |                 |               |        |
| 58 |                                              |                 |               |        |
| 59 |                                              |                 |               |        |
| 60 |                                              |                 |               |        |

1  
2  
3  
4  
5  
6  
7  
8  
9  
10  
11  
12  
13  
14  
15  
16  
17  
18  
19  
20  
21  
22  
23  
24  
25  
26  
27  
28  
29  
30  
31  
32  
33  
34  
35  
36  
37  
38  
39  
40  
41  
42  
43  
44  
45  
46  
47  
48  
49  
50  
51  
52  
53  
54  
55  
56  
57  
58  
59  
60

|                                       |                |                 |        |
|---------------------------------------|----------------|-----------------|--------|
| High-risk, n (%)                      | 1 166 (1.1%)   | 557 (23.0%)     |        |
| Intermediate-risk, n (%)              | 16 474 (16.0%) | 1 511 (62.4%)   |        |
| Low-risk, n (%)                       | 85 131 (82.8%) | 354 (14.6%)     |        |
| <b>Operative characteristics</b>      |                |                 |        |
| Surgery type, n (%)                   |                |                 | <0.001 |
| CABG                                  | 67 703 (65.9%) | 839 (34.6%)     |        |
| Single valve                          | 14 964 (14.6%) | 383 (15.8%)     |        |
| Multiple valves                       | 1 745 (1.7%)   | 118 (4.9%)      |        |
| CABG + single valve                   | 10 034 (9.8%)  | 463 (19.1%)     |        |
| CABG + multiple valves                | 690 (0.7%)     | 70 (2.9%)       |        |
| Thoracic aorta                        | 7 635 (7.4%)   | 549 (22.7%)     |        |
| Redo-sternotomy, n (%)                | 2 800 (2.7%)   | 148 (6.1%)      | <0.001 |
| Cardiogenic shock, n (%)              | 427 (0.4%)     | 46 (1.9%)       | <0.001 |
| Operative priority, n (%)             |                |                 | <0.001 |
| Emergent                              | 5,379 (5.2%)   | 392 (16.2%)     |        |
| Urgent                                | 31 487 (30.6%) | 1 074 (44.3%)   |        |
| Semi-urgent                           | 26 072 (25.4%) | 397 (16.4%)     |        |
| Elective                              | 39 833 (38.8%) | 559 (23.1%)     |        |
| Surgery duration, mean (SD), min      | 279.59 (80.67) | 350.27 (126.11) | <0.001 |
| Surgery duration, median (IQR), min   | 268 (225-319)  | 327 (265-403)   | <0.001 |
| <b>Post-operative characteristics</b> |                |                 |        |
| Length of stay, mean (SD), d          | 7.47 (4.19)    | 58.02 (36.35)   | <0.001 |
| Length of stay, IQR (SD), d           | 6 (5-8)        | 46 (37-66)      | <0.001 |

Abbreviations: SD = standard deviation; IQR = interquartile range; BMI = body mass index; MI = myocardial infarction; CCS = Canadian Cardiovascular Society; ACS = acute coronary syndrome; LVEF = left ventricular ejection fraction; NYHA = New York Heart Association; COPD = chronic obstructive pulmonary disease; GFR = glomerular filtration rate; CABG = coronary artery bypass grafting.

\* Gilbert et al. (2018)

Table 2. Multivariable predictors of prolonged hospital length of stay of  $\geq 35$  days.

| Variable                         | $\beta$ -coefficient | Adjusted Odds Ratio (95% CI) | P Value |
|----------------------------------|----------------------|------------------------------|---------|
| <b>Demographics</b>              |                      |                              |         |
| Age                              | 0.0205               | 1.02 (1.02-1.03)             | <0.001  |
| BMI, per 1 kg/m <sup>2</sup>     | -0.0380              | 0.96 (0.94-0.98)             | 0.0005  |
| Rural                            | -0.1848              | 0.83 (0.71-0.97)             | 0.0166  |
| <b>Co-morbidities</b>            |                      |                              |         |
| CCS classification               |                      |                              |         |
| 0                                | N/A                  | Reference                    | N/A     |
| 1                                | -0.1967              | 0.82 (0.67-1.01)             | 0.0603  |
| 2                                | -0.3822              | 0.68 (0.55-0.85)             | 0.0006  |
| 3                                | 0.0114               | 1.01 (0.84-1.22)             | 0.9064  |
| 4                                | 0.1511               | 1.16 (0.89-1.53)             | 0.2751  |
| Low risk ACS                     | -0.2074              | 0.81 (0.67-0.99)             | 0.0357  |
| Intermediate risk ACS            | -0.0392              | 0.96 (0.8-1.16)              | 0.6854  |
| High risk ACS                    | 0.4073               | 1.50 (1.18-1.91)             | 0.0009  |
| Emergent                         | 0.803                | 2.23 (1.79-2.78)             | <.0001  |
| LVEF                             |                      |                              |         |
| $\geq 50\%$                      | N/A                  | Reference                    | N/A     |
| 35-49%                           | 0.1052               | 1.11 (0.98-1.26)             | 0.1093  |
| 20-35%                           | 0.0506               | 1.05 (0.89-1.24)             | 0.5551  |
| <20%                             | 0.5591               | 1.75 (1.31-2.34)             | 0.0002  |
| Heart failure                    | 0.3731               | 1.45 (1.29-1.64)             | <0.001  |
| CVD                              | -0.2409              | 0.79 (0.68-0.91)             | 0.0009  |
| Diabetes (treated)               | 0.1497               | 1.16 (1.04-1.3)              | 0.0105  |
| eGFR                             | -0.00390             | 1.00 (0.99-1.00)             | 0.0007  |
| Anemia                           | -0.2997              | 0.74 (0.65-0.84)             | <0.001  |
| Depression                       | 0.3184               | 1.37 (1.08-1.75)             | 0.0100  |
| Malignancy                       | -0.2093              | 0.81 (0.66-0.99)             | 0.0399  |
| Valvular disease                 | -0.2247              | 0.80 (0.68-0.94)             | 0.0078  |
| Hospital frailty risk score *    |                      |                              |         |
| High-risk                        | 4.2723               | 71.69 (59.01-87.09)          | <0.001  |
| Intermediate-risk                | 2.6876               | 14.70 (12.75-16.94)          | <0.001  |
| Low-risk                         | N/A                  | Reference                    | N/A     |
| <b>Operative Characteristics</b> |                      |                              |         |
| Surgery type                     |                      |                              |         |
| CABG                             | N/A                  | Reference                    | N/A     |



|    |                              |         |                     |        |
|----|------------------------------|---------|---------------------|--------|
| 1  |                              |         |                     |        |
| 2  |                              |         |                     |        |
| 3  | Single valve                 | 0.7583  | 2.13 (1.71-2.66)    | <0.001 |
| 4  | Multivalve                   | 0.8855  | 2.42 (1.77-3.33)    | <0.001 |
| 5  | CABG + single valve          | 0.6876  | 1.99 (1.63-2.43)    | <0.001 |
| 6  | CABG + multivalve            | 1.0779  | 2.94 (2.06-4.19)    | <0.001 |
| 7  | Thoracic aorta               | 0.9391  | 2.56 (2.14-3.06)    | <0.001 |
| 8  | Surgery duration, per 10 min | 0.00393 | 1.040 (1.035-1.045) | <0.001 |
| 9  |                              |         |                     |        |
| 10 |                              |         |                     |        |
| 11 |                              |         |                     |        |
| 12 |                              |         |                     |        |
| 13 |                              |         |                     |        |
| 14 |                              |         |                     |        |
| 15 |                              |         |                     |        |
| 16 |                              |         |                     |        |
| 17 |                              |         |                     |        |
| 18 |                              |         |                     |        |
| 19 |                              |         |                     |        |
| 20 |                              |         |                     |        |
| 21 |                              |         |                     |        |
| 22 |                              |         |                     |        |
| 23 |                              |         |                     |        |
| 24 |                              |         |                     |        |
| 25 |                              |         |                     |        |
| 26 |                              |         |                     |        |
| 27 |                              |         |                     |        |
| 28 |                              |         |                     |        |
| 29 |                              |         |                     |        |
| 30 |                              |         |                     |        |
| 31 |                              |         |                     |        |
| 32 |                              |         |                     |        |
| 33 |                              |         |                     |        |
| 34 |                              |         |                     |        |
| 35 |                              |         |                     |        |
| 36 |                              |         |                     |        |
| 37 |                              |         |                     |        |
| 38 |                              |         |                     |        |
| 39 |                              |         |                     |        |
| 40 |                              |         |                     |        |
| 41 |                              |         |                     |        |
| 42 |                              |         |                     |        |
| 43 |                              |         |                     |        |
| 44 |                              |         |                     |        |
| 45 |                              |         |                     |        |
| 46 |                              |         |                     |        |
| 47 |                              |         |                     |        |
| 48 |                              |         |                     |        |
| 49 |                              |         |                     |        |
| 50 |                              |         |                     |        |
| 51 |                              |         |                     |        |
| 52 |                              |         |                     |        |
| 53 |                              |         |                     |        |
| 54 |                              |         |                     |        |
| 55 |                              |         |                     |        |
| 56 |                              |         |                     |        |
| 57 |                              |         |                     |        |
| 58 |                              |         |                     |        |
| 59 |                              |         |                     |        |
| 60 |                              |         |                     |        |

Abbreviations: BMI = body mass index; CCS = Canadian Cardiovascular Society; LVEF = left ventricular ejection fraction; CVD = cerebrovascular disease; e GFR = estimated glomerular filtration rate; CABG = coronary artery bypass grafting.

\* Gilbert et al. (2018)

Confidential

**Table 3. Multivariable predictors of a continuous model describing actual hospital length of stay in days.**

| Variable                     | $\beta$ -coefficient | Rate Ratio (95% CI) | P Value |
|------------------------------|----------------------|---------------------|---------|
| <b>Demographics</b>          |                      |                     |         |
| Age                          | 0.007500             | 1.01 (1.01-1.01)    | <0.001  |
| Sex, female                  | 0.077071             | 1.08 (1.07-1.09)    | <0.001  |
| BMI, per 1 kg/m <sup>2</sup> | -0.006353            | 0.994 (0.993-0.995) | <0.001  |
| Rural                        | -0.038102            | 0.96 (0.96-0.97)    | <0.001  |
| Community hospital           | 0.032697             | 1.03 (1.03-1.04)    | <0.001  |
| <b>Co-morbidities</b>        |                      |                     |         |
| Atrial fibrillation          | 0.023919             | 1.02 (1.01-1.04)    | <0.001  |
| <b>CCS</b>                   |                      |                     |         |
| 0                            | N/A                  | Reference           | N/A     |
| 1                            | -0.013390            | 0.99 (0.98-1.00)    | 0.0185  |
| 2                            | -0.011821            | 0.99 (0.98-1.00)    | 0.0228  |
| 3                            | 0.007720             | 1.01 (1.00-1.02)    | 0.1461  |
| 4                            | 0.023578             | 1.02 (1.01-1.04)    | 0.0061  |
| Low risk ACS                 | 0.004400             | 1.00 (0.99-1.02)    | 0.4320  |
| Intermediate risk ACS        | 0.039144             | 1.04 (1.03-1.05)    | <.001   |
| High risk ACS                | 0.038623             | 1.04 (1.02-1.06)    | 0.0013  |
| Emergent                     | 0.135774             | 1.15 (1.12-1.18)    | <.001   |
| <b>LVEF</b>                  |                      |                     |         |
| ≥ 50%                        | N/A                  | Reference           | N/A     |
| 35-49%                       | 0.014921             | 1.02 (1.01-1.02)    | <0.001  |
| 20-35%                       | 0.045719             | 1.05 (1.04-1.06)    | <0.001  |
| <20%                         | 0.115012             | 1.12 (1.10-1.15)    | <0.001  |
| <b>NHYA class</b>            |                      |                     |         |
| 1                            | N/A                  | Reference           | N/A     |
| 2                            | 0.011695             | 1.01 (1.00-1.02)    | 0.0111  |
| 3                            | 0.026415             | 1.03 (1.02-1.04)    | <0.001  |
| 4                            | 0.060932             | 1.06 (1.04-1.08)    | <0.001  |
| Heart Failure                | 0.072425             | 1.08 (1.07-1.08)    | <0.001  |
| <b>Endocarditis</b>          |                      |                     |         |
| Acute                        | 0.199950             | 1.22 (1.18-1.26)    | <0.001  |
| Subacute                     | 0.025726             | 1.03 (0.98-1.07)    | 0.2623  |
| CVD                          | 0.027025             | 1.03 (1.02-1.04)    | <0.001  |

|                               |           |                  |        |
|-------------------------------|-----------|------------------|--------|
| PAD                           | 0.018385  | 1.02 (1.01-1.03) | <0.001 |
| COPD                          | 0.037918  | 1.04 (1.03-1.05) | <0.001 |
| Diabetes (treated)            | 0.031403  | 1.03 (1.03-1.04) | <0.001 |
| eGFR                          | -0.001126 | 1.00 (1.00-1.00) | <0.001 |
| Anemia                        | 0.028545  | 1.03 (1.02-1.04) | <0.001 |
| Alcohol use                   | 0.033998  | 1.03 (1.01-1.06) | 0.0041 |
| Dementia                      | 0.046793  | 1.05 (1.02-1.07) | 0.0002 |
| Depression                    | 0.079752  | 1.08 (1.06-1.11) | <0.001 |
| Psychosis                     | 0.134990  | 1.14 (1.08-1.21) | <0.001 |
| Pulmonary circulatory disease | 0.078703  | 1.08 (1.06-1.10) | <0.001 |
| Valvular disease              | -0.014392 | 0.99 (0.98-1.00) | 0.0082 |
| Hospital frailty risk score * |           |                  |        |
| High-risk                     | 0.510984  | 1.67 (1.62-1.71) | <0.001 |
| Intermediate-risk             | 0.340613  | 1.41 (1.39-1.42) | <0.001 |
| Low-risk                      | N/A       | Reference        | N/A    |

#### Operative Characteristics

##### Surgery type

|                              |           |                       |        |
|------------------------------|-----------|-----------------------|--------|
| CABG                         | N/A       | Reference             | N/A    |
| Single valve                 | 0.125445  | 1.13 (1.12-1.15)      | <0.001 |
| Multiple valves              | 0.224929  | 1.25 (1.22-1.28)      | <0.001 |
| CABG + Valve                 | 0.131862  | 1.14 (1.13-1.16)      | <0.001 |
| CABG + Multivalve            | 0.174254  | 1.19 (1.15-1.23)      | <0.001 |
| Thoracic aorta               | 0.141773  | 1.15 (1.14-1.17)      | <0.001 |
| Redo sternotomy              | -0.031499 | 0.97 (0.95-0.98)      | <0.001 |
| Surgery duration, per 10 min | 0.000996  | 1.010 (1.0096-1.0104) | <0.001 |

##### Surgical priority

|             |          |                  |        |
|-------------|----------|------------------|--------|
| Emergent    | 0.047870 | 1.05 (1.03-1.07) | <0.001 |
| Urgent      | 0.002829 | 1.00 (0.99-1.01) | 0.5711 |
| Semi-urgent | 0.004538 | 1.00 (1.00-1.01) | 0.2277 |
| Elective    | N/A      | Reference        | N/A    |

Abbreviations: BMI = body mass index; CCS = Canadian Cardiovascular Society; LVEF = left ventricular ejection fraction; NYHA = New York Heart Association; CVD = cerebrovascular disease; PAD = peripheral arterial disease; COPD = chronic obstructive pulmonary disease; eGFR = estimated glomerular filtration rate; CABG = coronary artery bypass grafting.

\* Gilbert et al. (2018)

1  
2  
3  
4  
5  
6  
7  
8  
9  
10  
11  
12  
13  
14  
15  
16  
17  
18  
19  
20  
21  
22  
23  
24  
25  
26  
27  
28  
29  
30  
31  
32  
33  
34  
35  
36  
37  
38  
39  
40  
41  
42  
43  
44  
45  
46  
47  
48  
49  
50  
51  
52  
53  
54  
55  
56  
57  
58  
59  
60

**FIGURES**

**Figure 1.** Calibration plot of observed vs. predicted risk of extremely prolonged postoperative hospital length of stay of  $\geq 35$  days, according to deciles of expected rate.

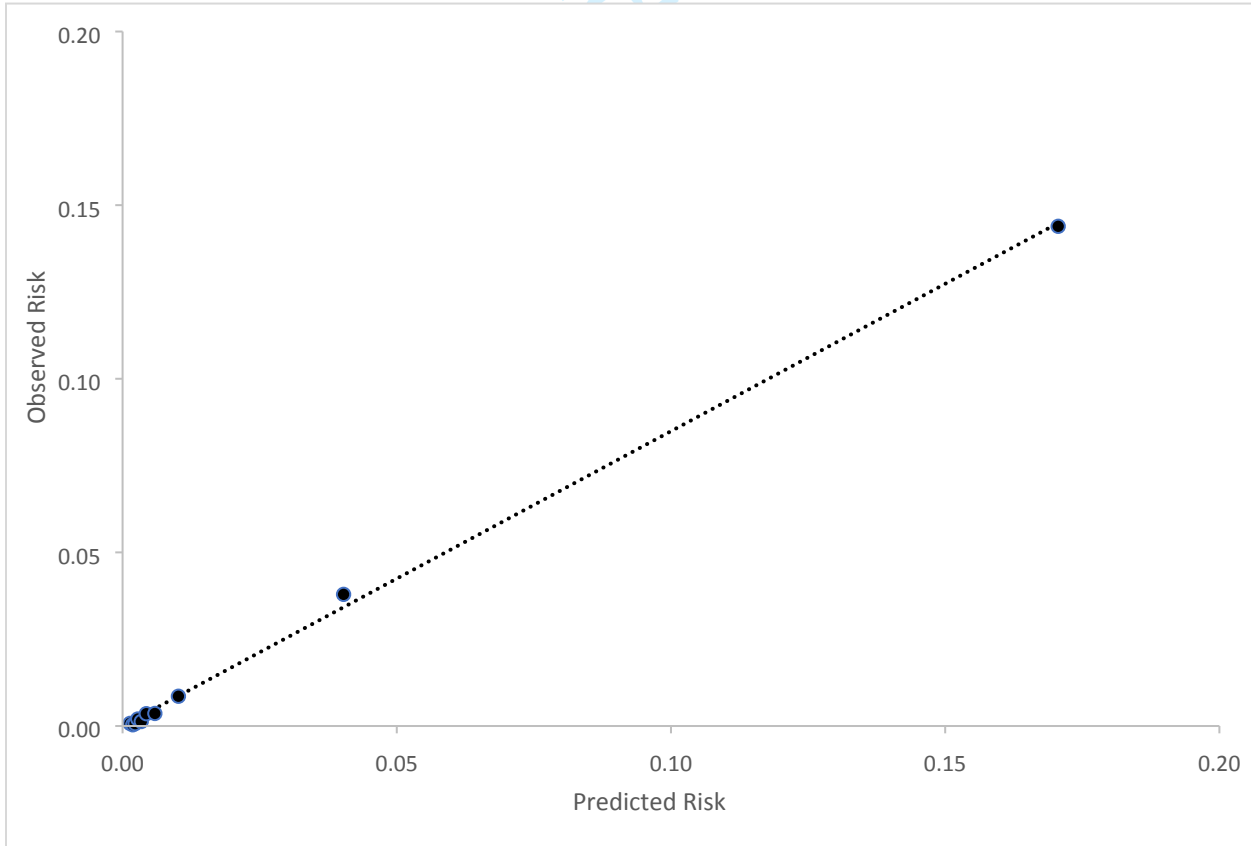

1  
2  
3  
4  
5  
6  
7  
8  
9  
10  
11  
12  
13  
14  
15  
16  
17  
18  
19  
20  
21  
22  
23  
24  
25  
26  
27  
28  
29  
30  
31  
32  
33  
34  
35  
36  
37  
38  
39  
40  
41  
42  
43  
44  
45  
46  
47  
48  
49  
50  
51  
52  
53  
54  
55  
56  
57  
58  
59  
60

**Figure 2.** Calibration plot of observed vs. predicted average lengths of hospital stay in days, within each decile of expected length of stay.

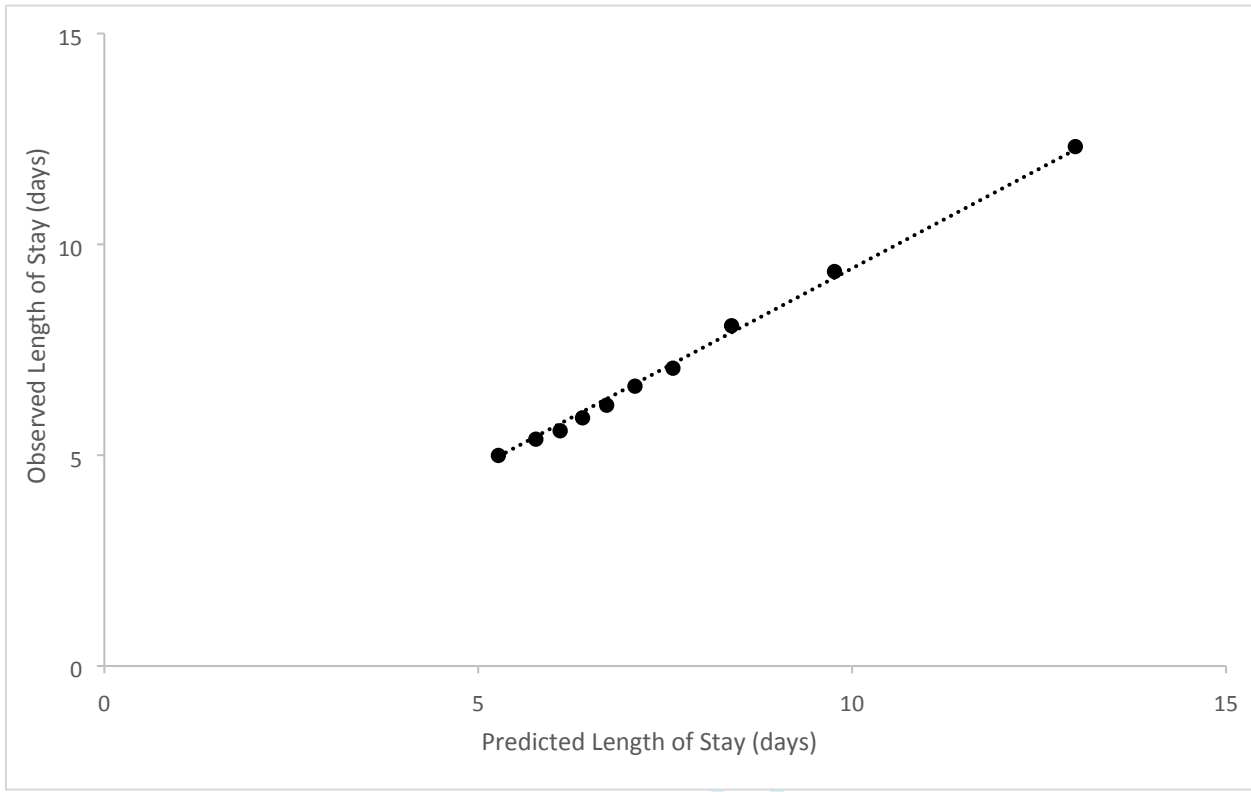

Supplement: open-2022-0103-original-submission.pdf [file open-2022-0103-original-submission.pdf]
